# Supplementary material for: Neuroprotective Effect of CR-777, a Glutathione Derivative of Withaferin A, Obtained through the Bioconversion of Withania somnifera (L.) Dunal Extract by the Fungus Beauveria bassiana
Source: PubMed Central journal article supplement (PMC6943490; doi:10.3390/molecules24244599), 2019-12-16
Supplement: molecules-24-04599-s001.pdf [file molecules-24-04599-s001.pdf]

## Supplementary information

**Neuroprotective effect of CR-777, the glutathione derivative of withaferin A, obtained through the bioconversion of *Withania somnifera* (L.) Dunal extract by the fungus *Beauveria bassiana***

**Chérif Rabhi,<sup>1</sup> Guillaume Arcile,<sup>2</sup> Géraldine Le Goff,<sup>2</sup> Christian Da Costa Noble,<sup>1</sup> and Jamal Ouazzani <sup>2\*</sup>**

<sup>1</sup> Laboratoire Ethnodyne, 151 Boulevard Haussmann – 75008, Paris, France. c.rabhi@ethnodyne.com (C.R.); cdcn@horus-finance.com (C.D.C.N.)

<sup>2</sup> Institut de Chimie des Substances Naturelles ICSN, Centre National de la Recherche Scientifique, Avenue de la Terrasse 91198, Gif-sur-Yvette, France. guillaume.arcile@cnrs.fr (G.A.); geraldine.legoff@cnrs.fr (G.L.G.); jamal.ouazzani@cnrs.fr (J.O.).

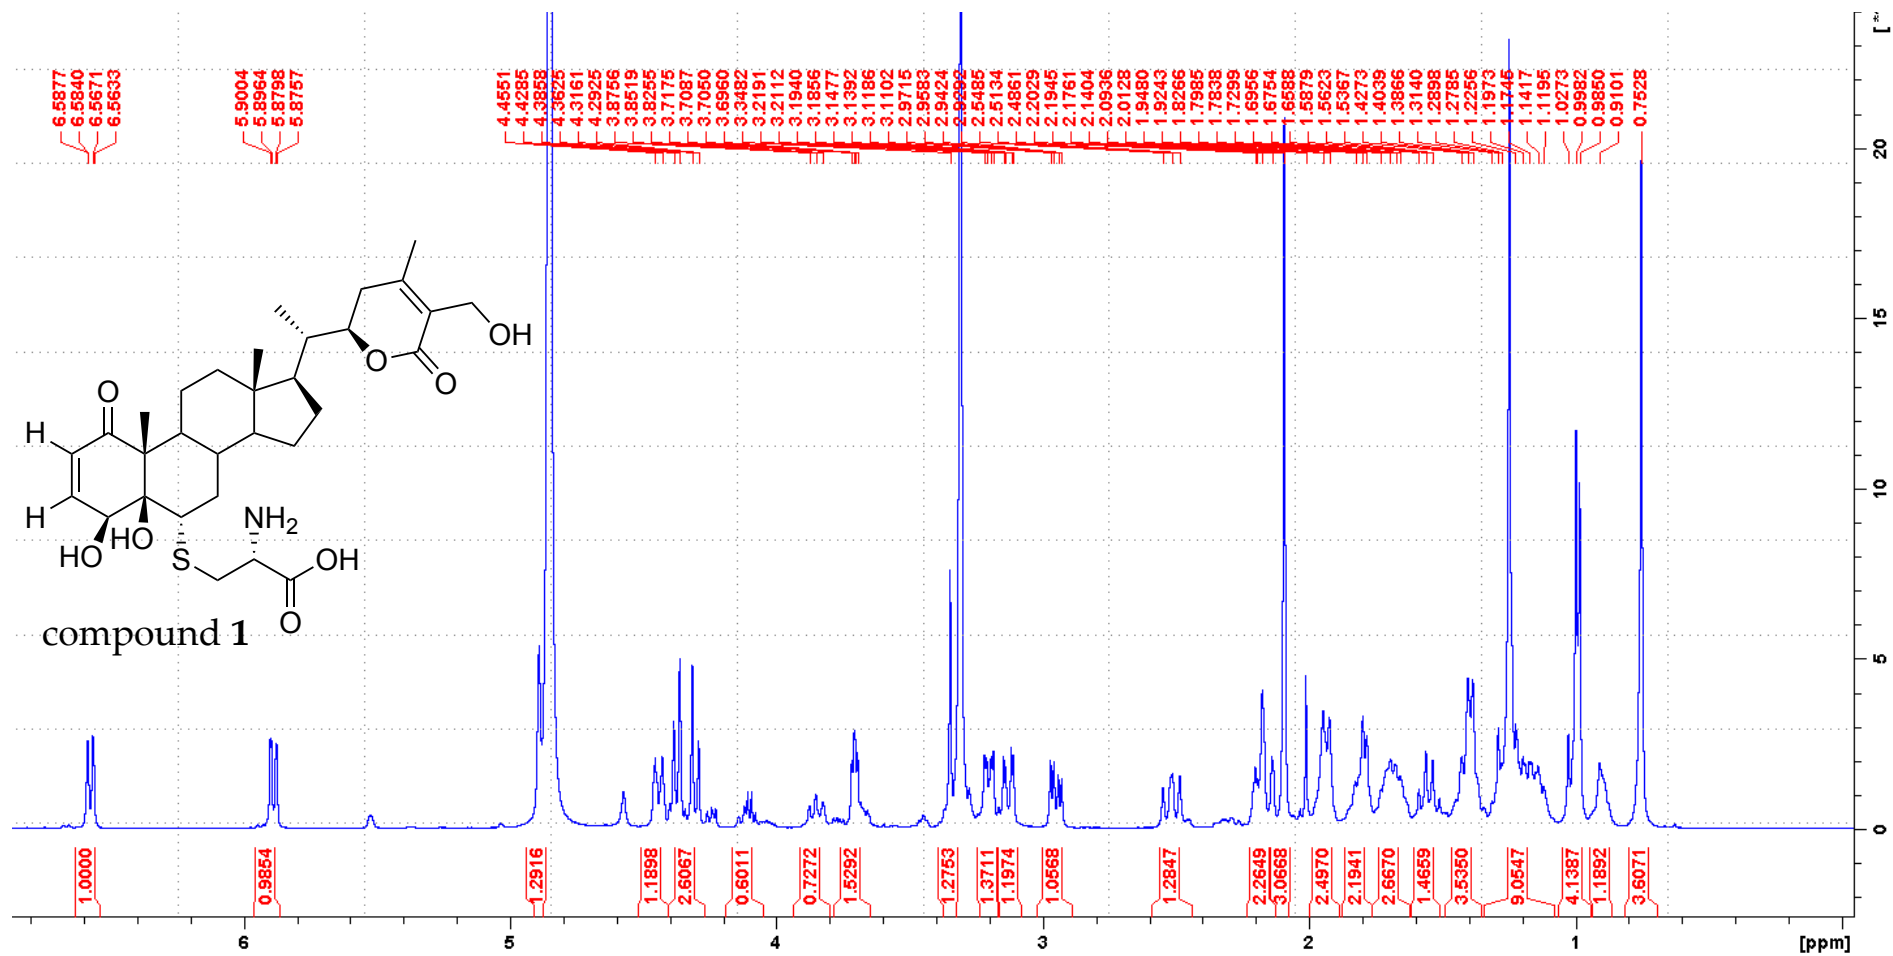

S1.  $^1\text{H-NMR}$  spectrum (500 MHz, MeOD) of compound 1

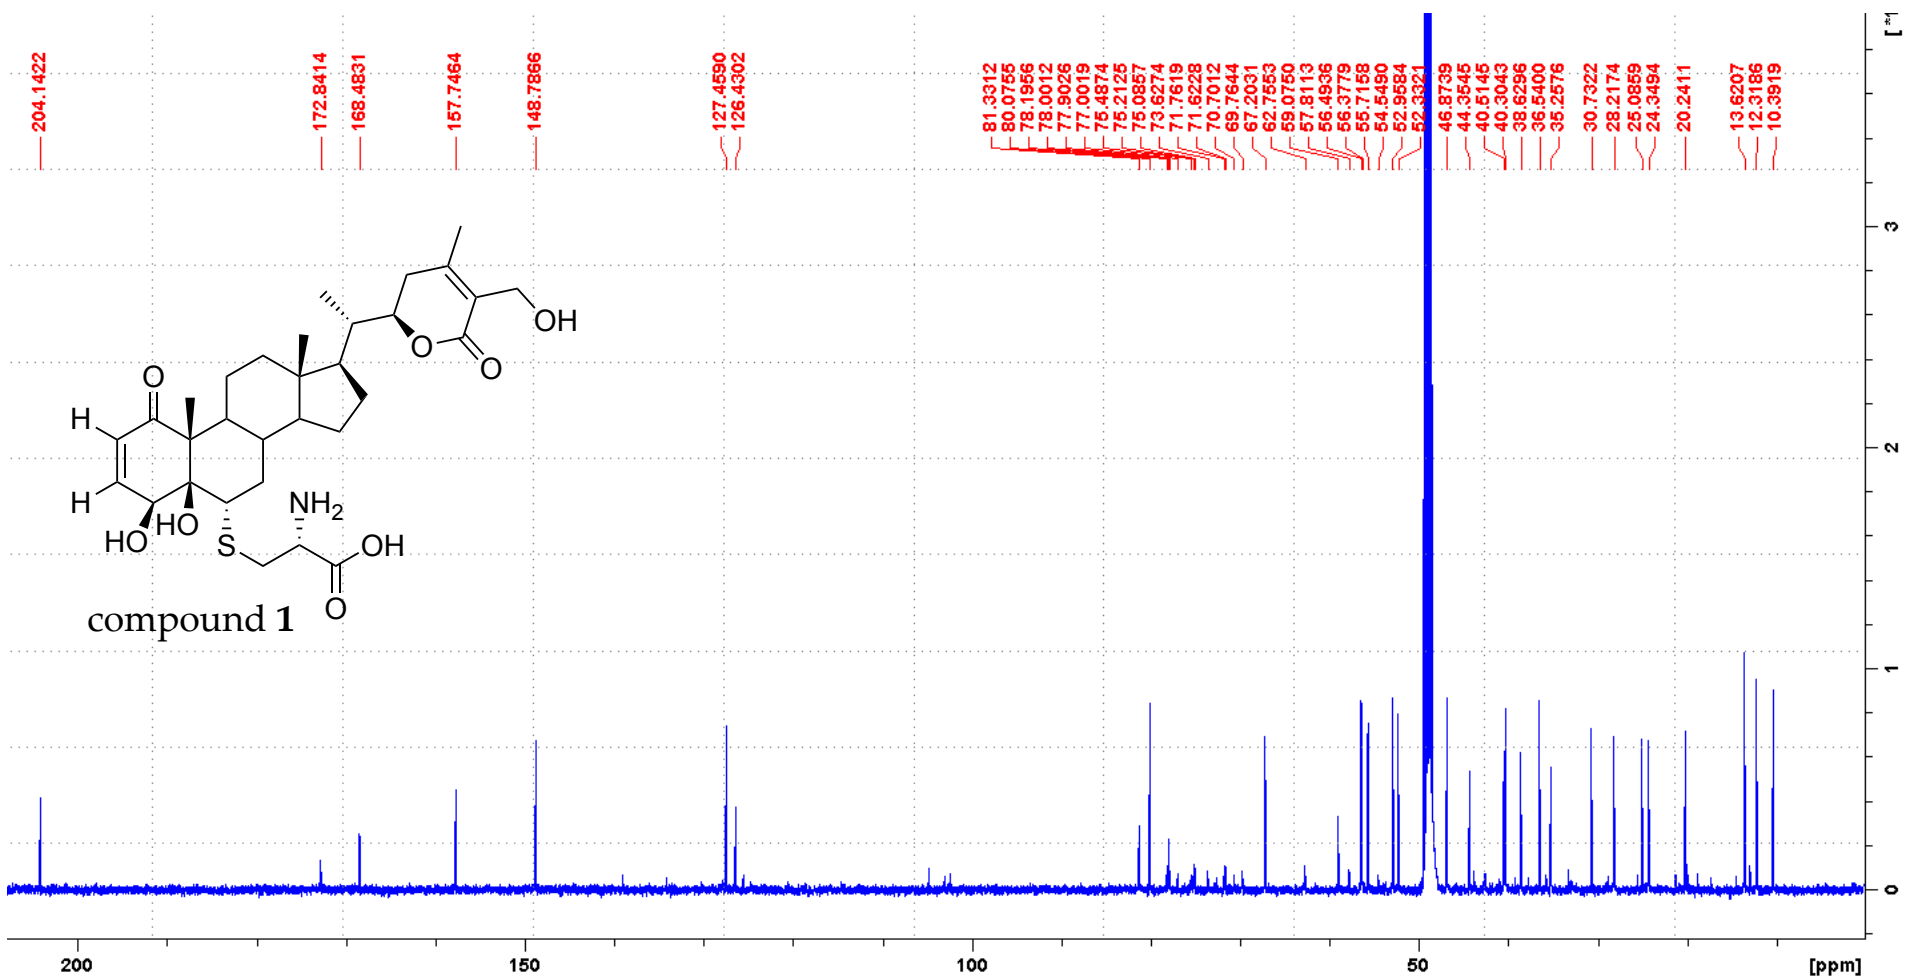

S2. <sup>13</sup>C-NMR spectrum (125 MHz, MeOD) of compound 1

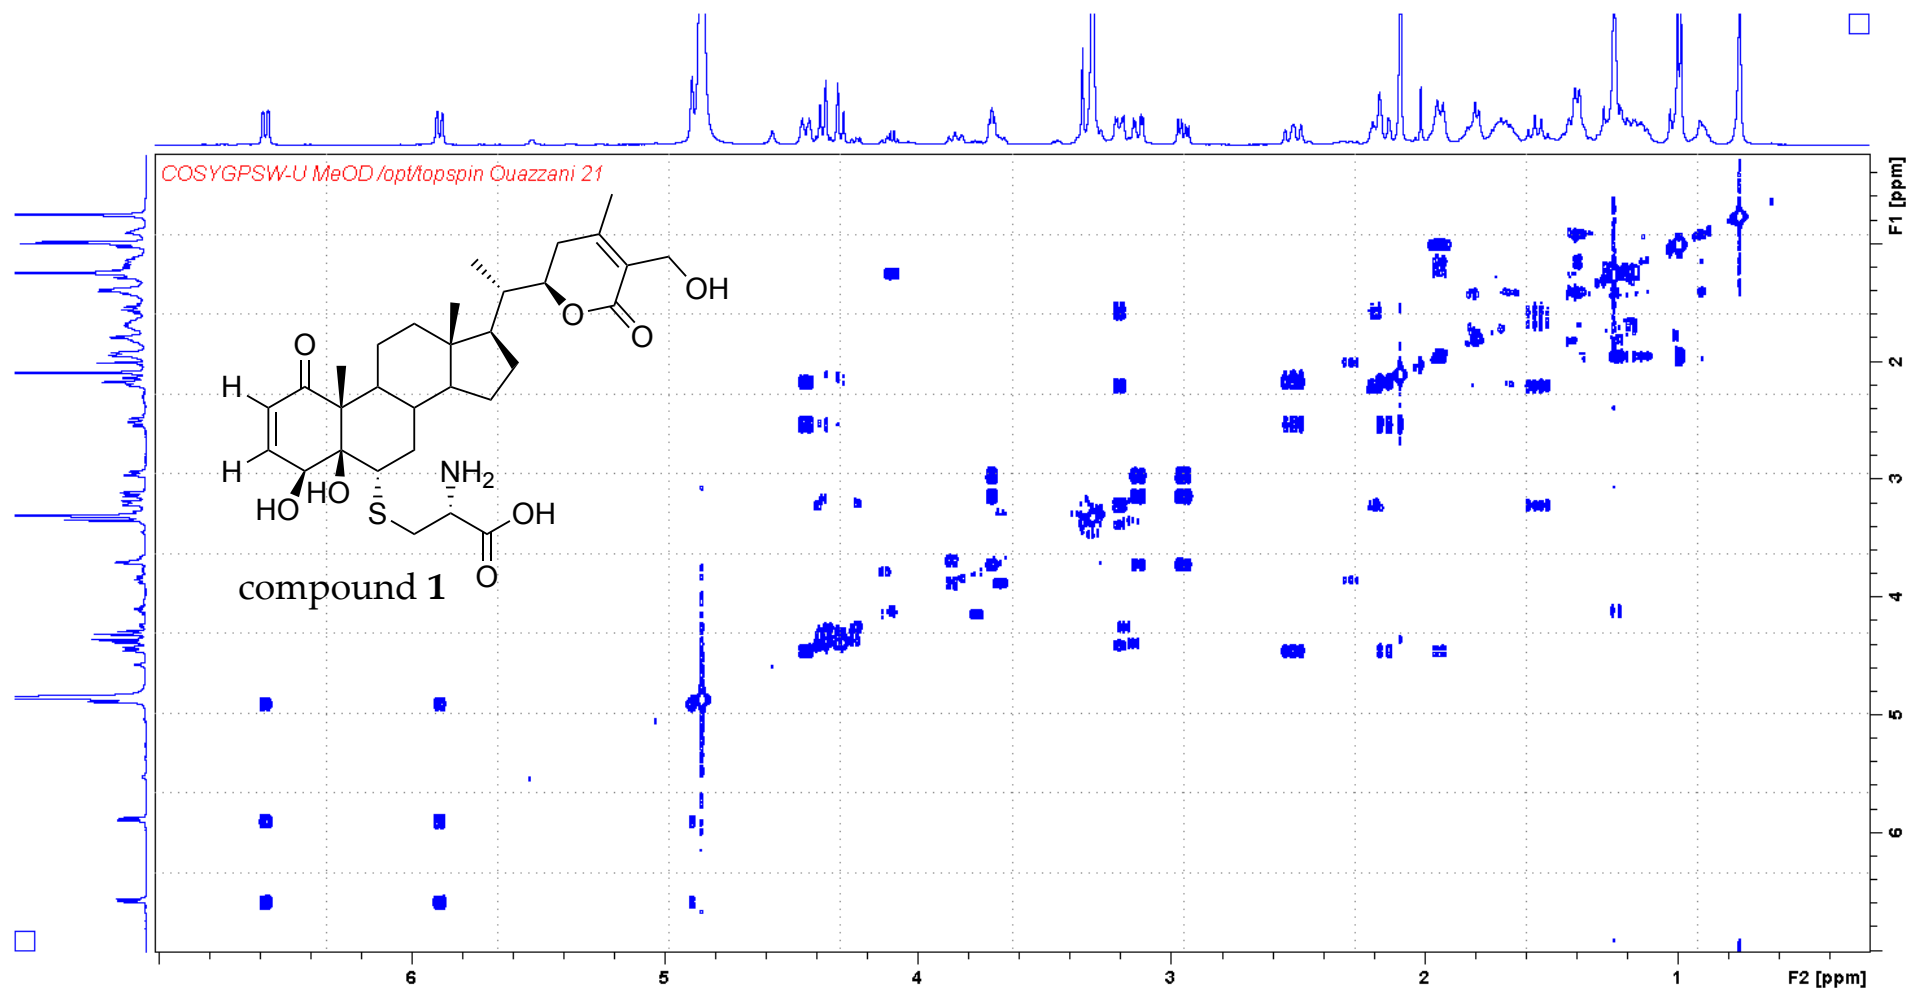

S3.  $^1\text{H}$ - $^1\text{H}$  COSY NMR spectrum (500 MHz, MeOD) of compound 1

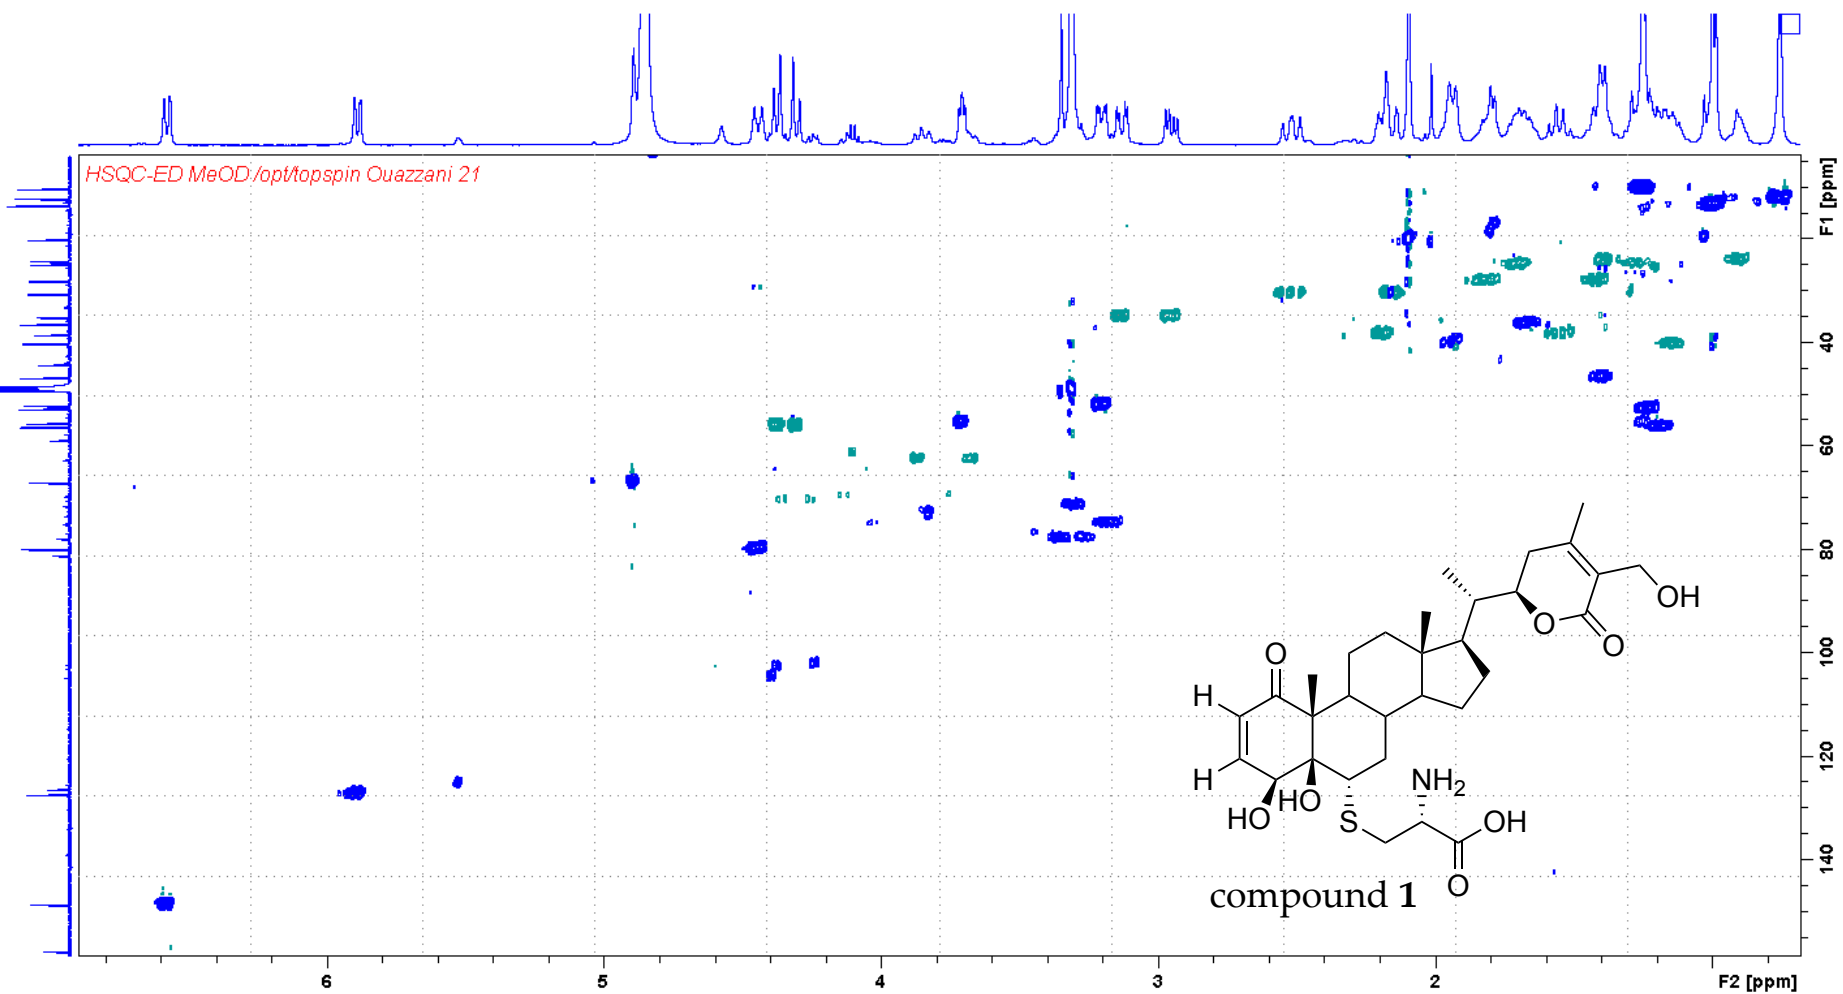

S4.  $^1\text{H}$ - $^{13}\text{C}$  HSQC-ED NMR spectrum (500 MHz, MeOD) of compound 1

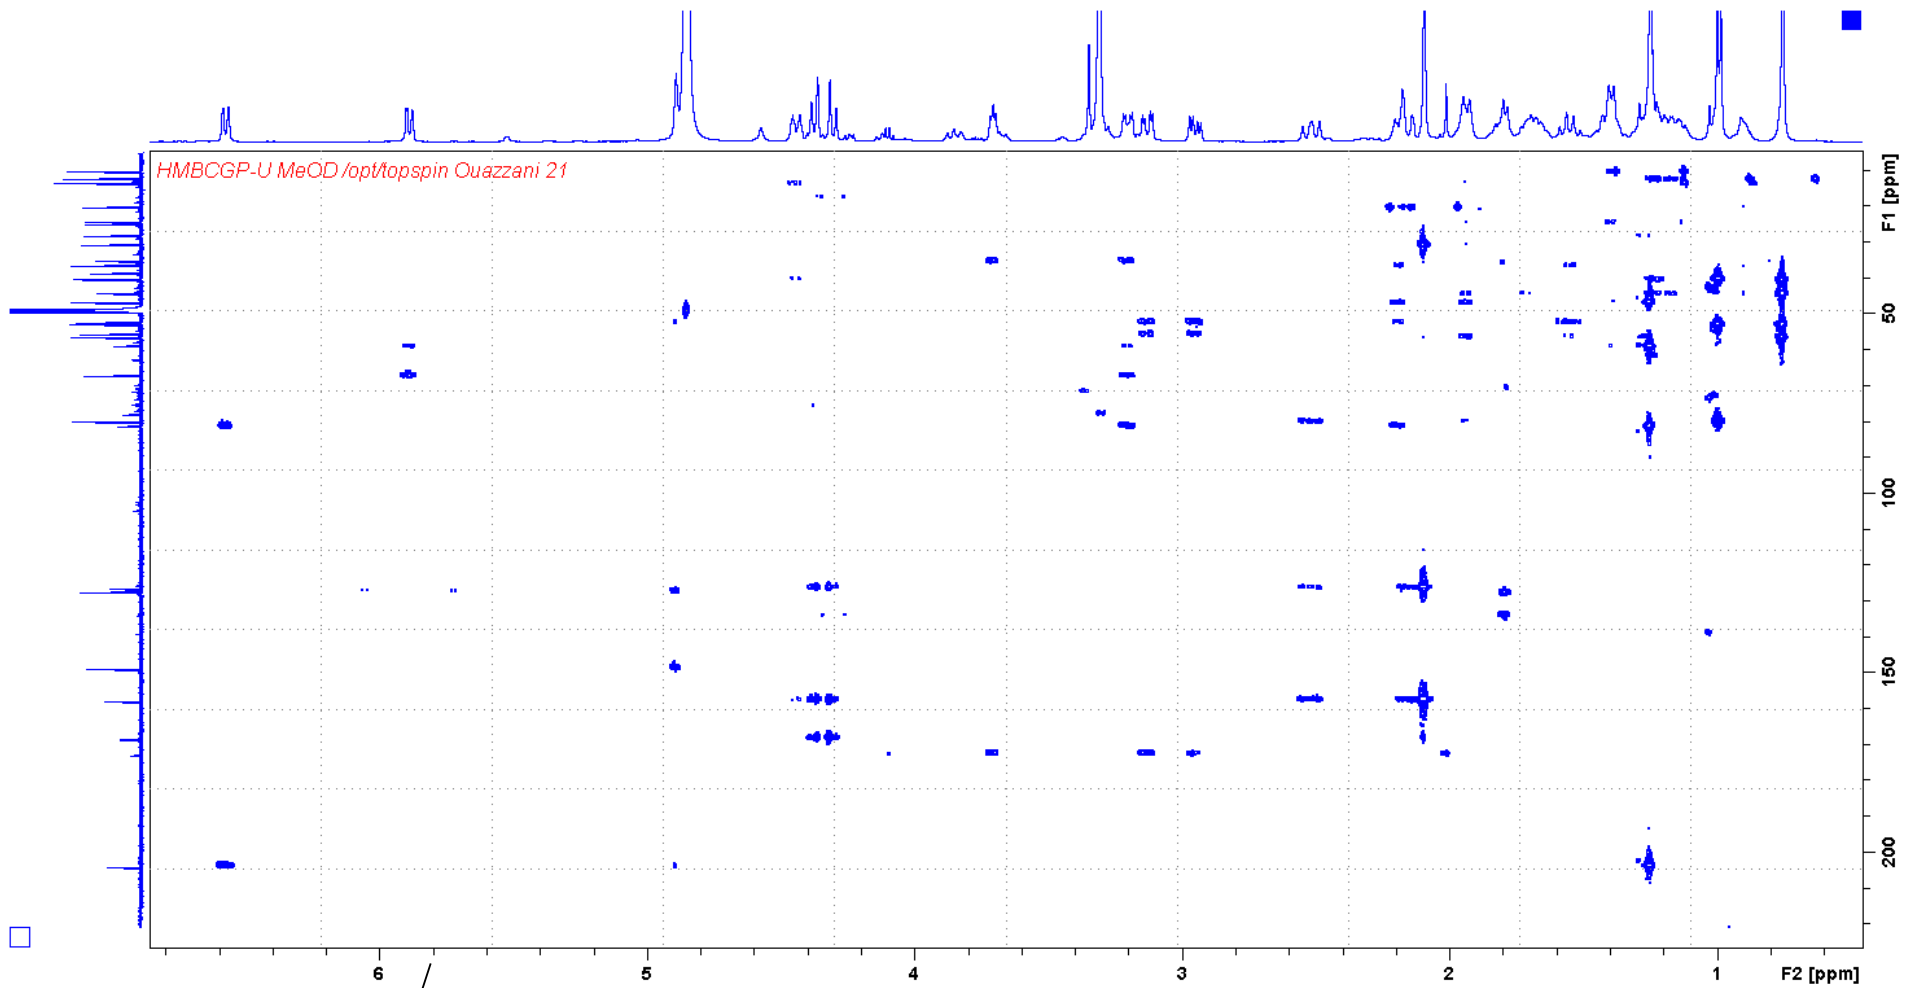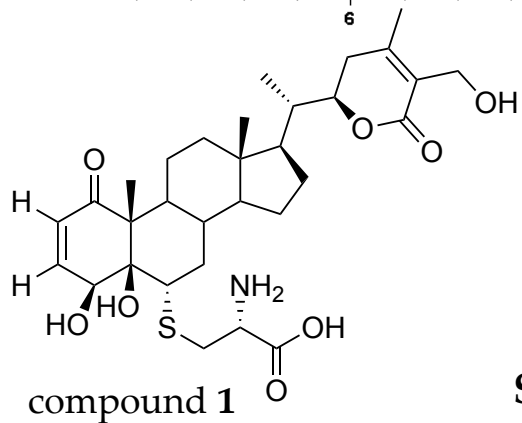

**S5.**  $^1\text{H}$ - $^{13}\text{C}$  HMBC NMR spectrum (500 MHz, MeOD) of compound 1

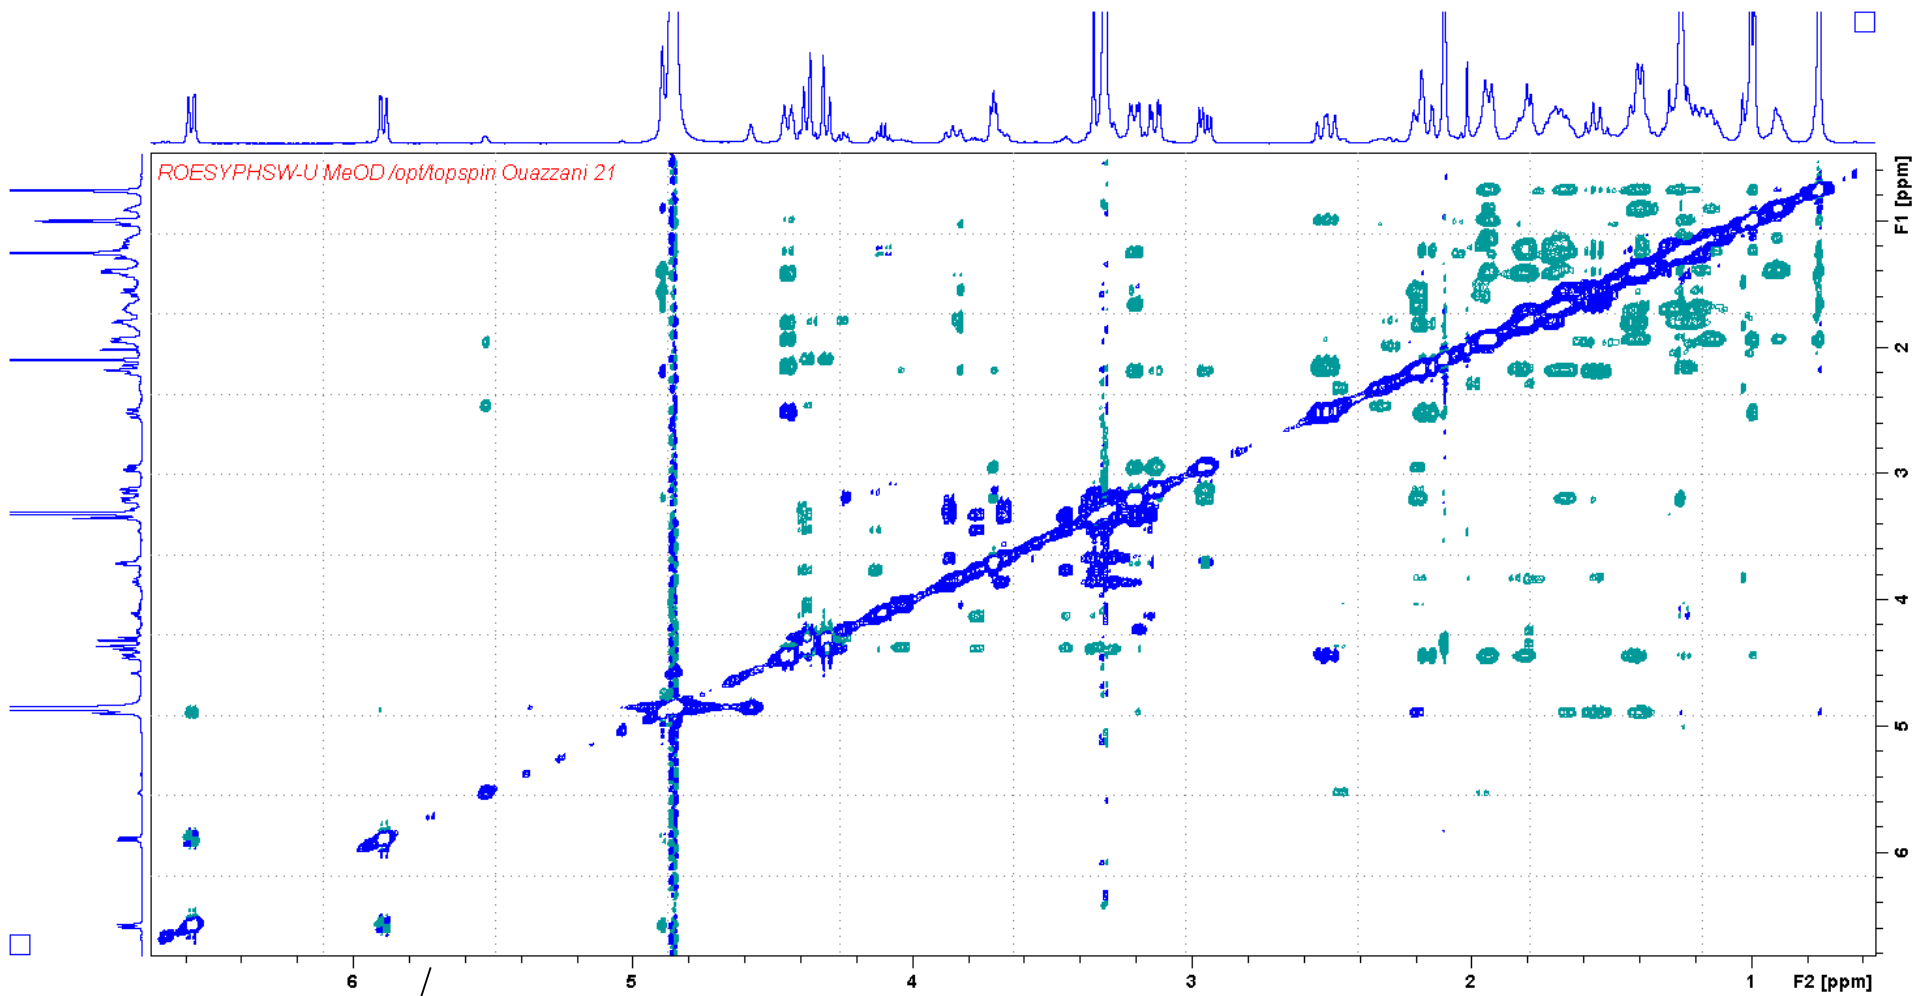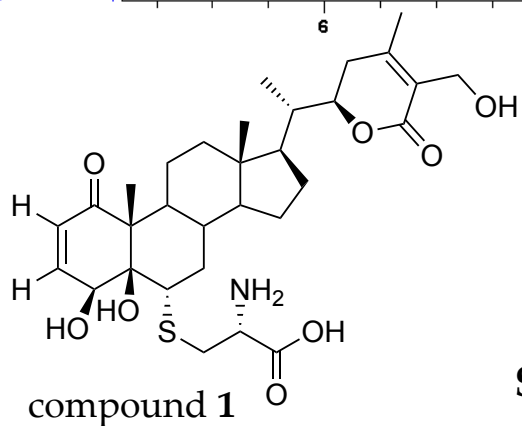

S6.  $^1\text{H}$ - $^1\text{H}$  ROESY NMR spectrum (500 MHz, MeOD) of compound 1

## Single Mass Analysis

Tolerance = 10.0 PPM / DBE: min = -1.5, max = 100.0

Element prediction: Off

Number of isotope peaks used for i-FIT = 9

Monoisotopic Mass, Even Electron Ions

1191 formula(e) evaluated with 9 results within limits (all results (up to 1000) for each mass)

Elements Used:

C: 0-50 H: 0-100 N: 0-3 O: 0-30 S: 0-1

OUAZZANI\_arcile106-2 21 (0.573) Cm (16:26-37:68x2.000)

1: TOF MS ES+  
1.63e+005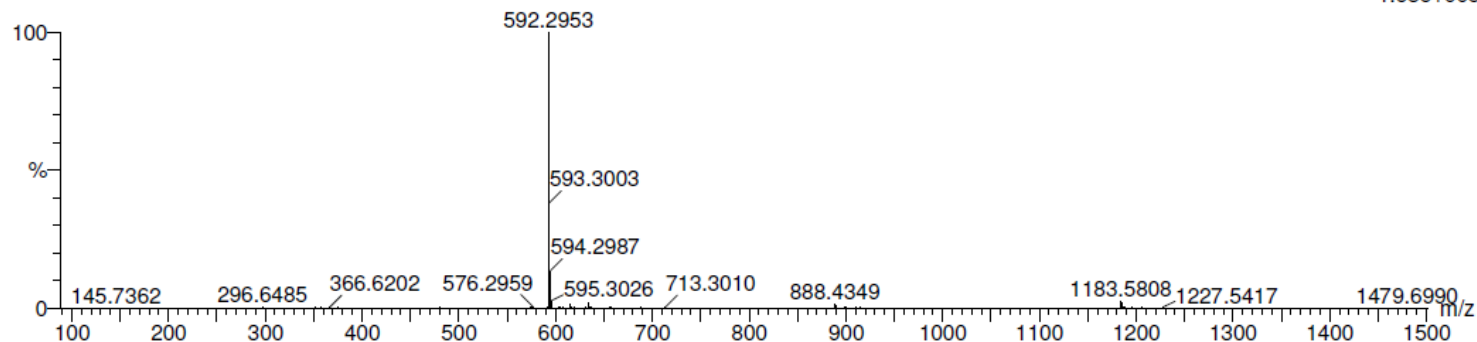

Minimum: -1.5  
Maximum: 5.0 10.0 100.0

| Mass     | Calc. Mass | mDa  | PPM  | DBE  | i-FIT | i-FIT (Norm) | Formula          |
|----------|------------|------|------|------|-------|--------------|------------------|
| 592.2953 | 592.2944   | 0.9  | 1.5  | 9.5  | 825.3 | 11.0         | C31 H46 N O8 S   |
|          | 592.2964   | -1.1 | -1.9 | 23.5 | 814.5 | 0.3          | C40 H38 N3 O2    |
|          | 592.2969   | -1.6 | -2.7 | 5.5  | 817.1 | 2.9          | C27 H46 N O13    |
|          | 592.2929   | 2.4  | 4.1  | 1.5  | 822.1 | 7.8          | C22 H46 N3 O15   |
|          | 592.2910   | 4.3  | 7.3  | 14.5 | 817.3 | 3.1          | C34 H42 N O8     |
|          | 592.2998   | -4.5 | -7.6 | 18.5 | 825.4 | 11.1         | C37 H42 N3 O2 S  |
|          | 592.2904   | 4.9  | 8.3  | 5.5  | 828.7 | 14.5         | C26 H46 N3 O10 S |
|          | 592.3003   | -5.0 | -8.4 | 0.5  | 825.4 | 11.1         | C24 H50 N O13 S  |
|          | 592.3004   | -5.1 | -8.6 | 27.5 | 816.2 | 1.9          | C45 H38 N        |

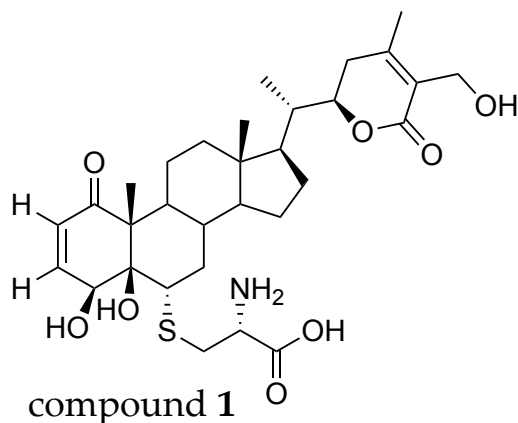

S7. HRMS spectrum of compound 1



$[\alpha]_D +129^\circ$  (2 mg/ mL MeOH)  
(25°C, JASCO P1010 polarimeter)

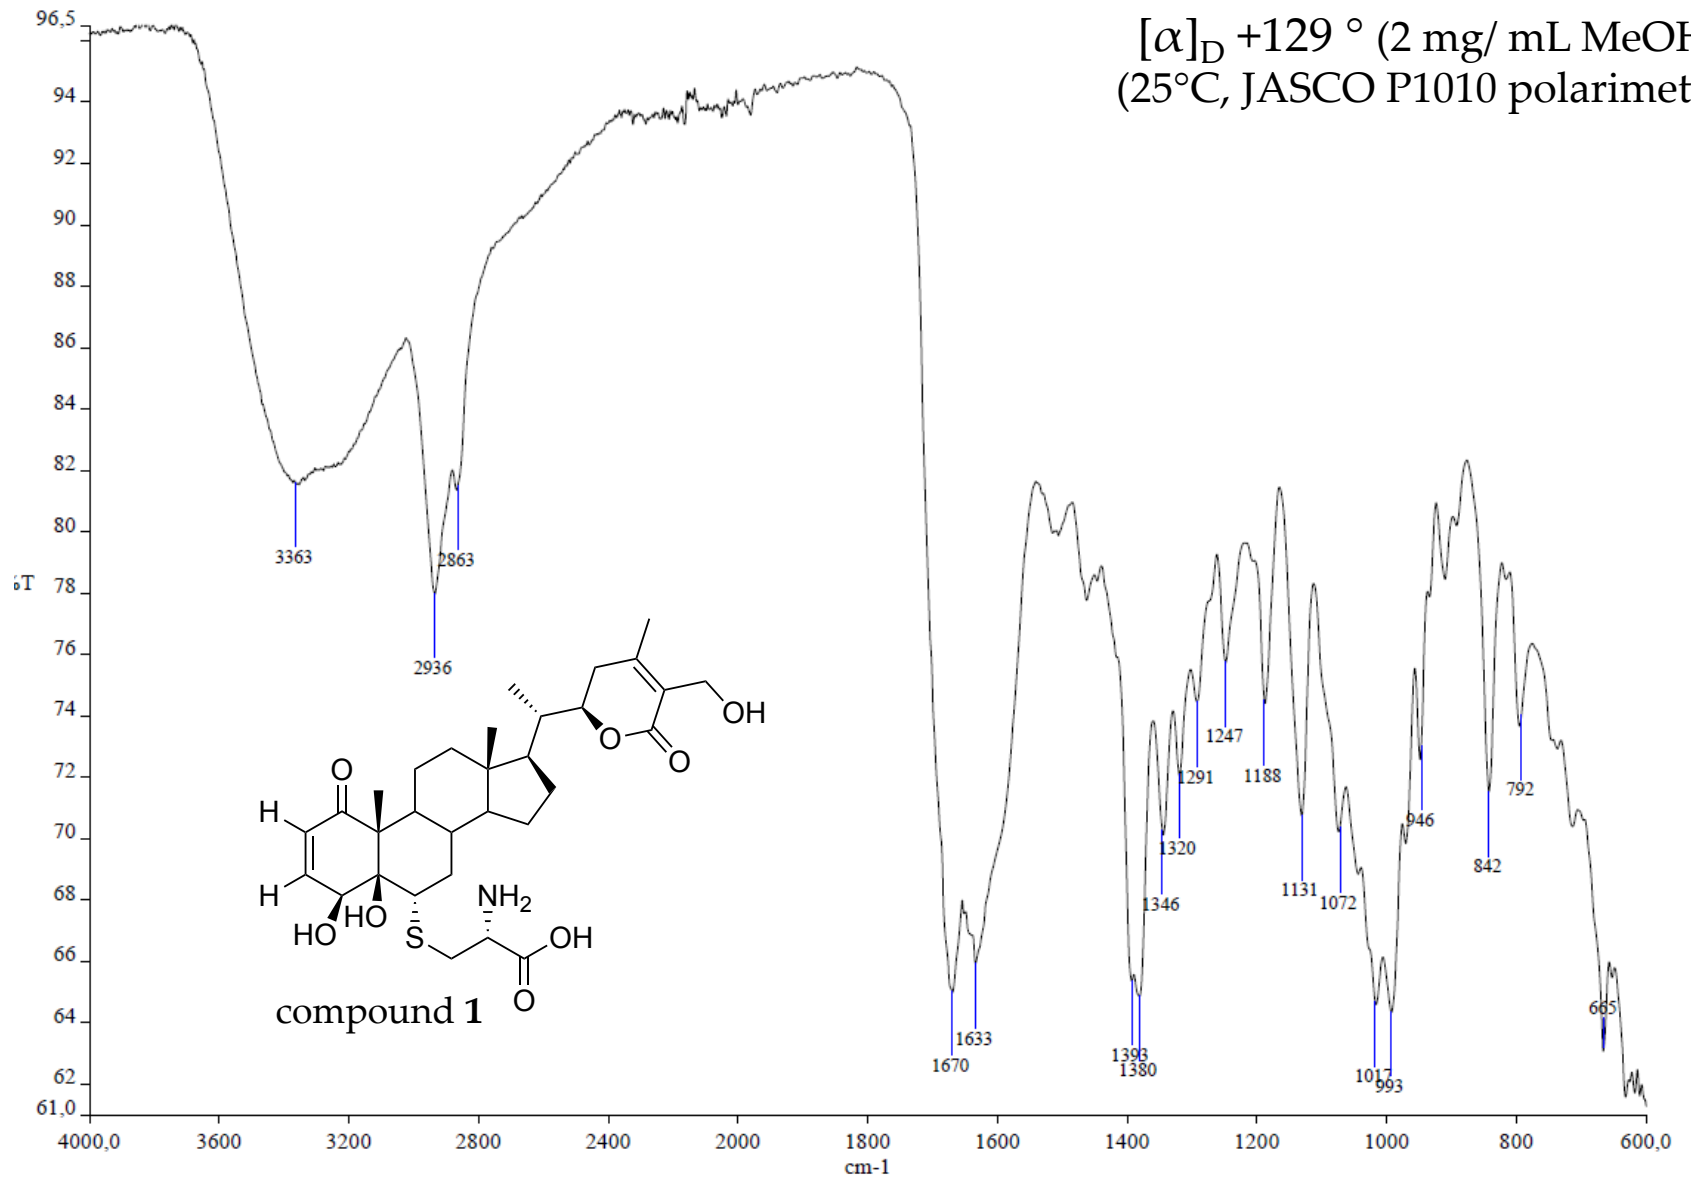

**S8.** IR spectrum of compound 1

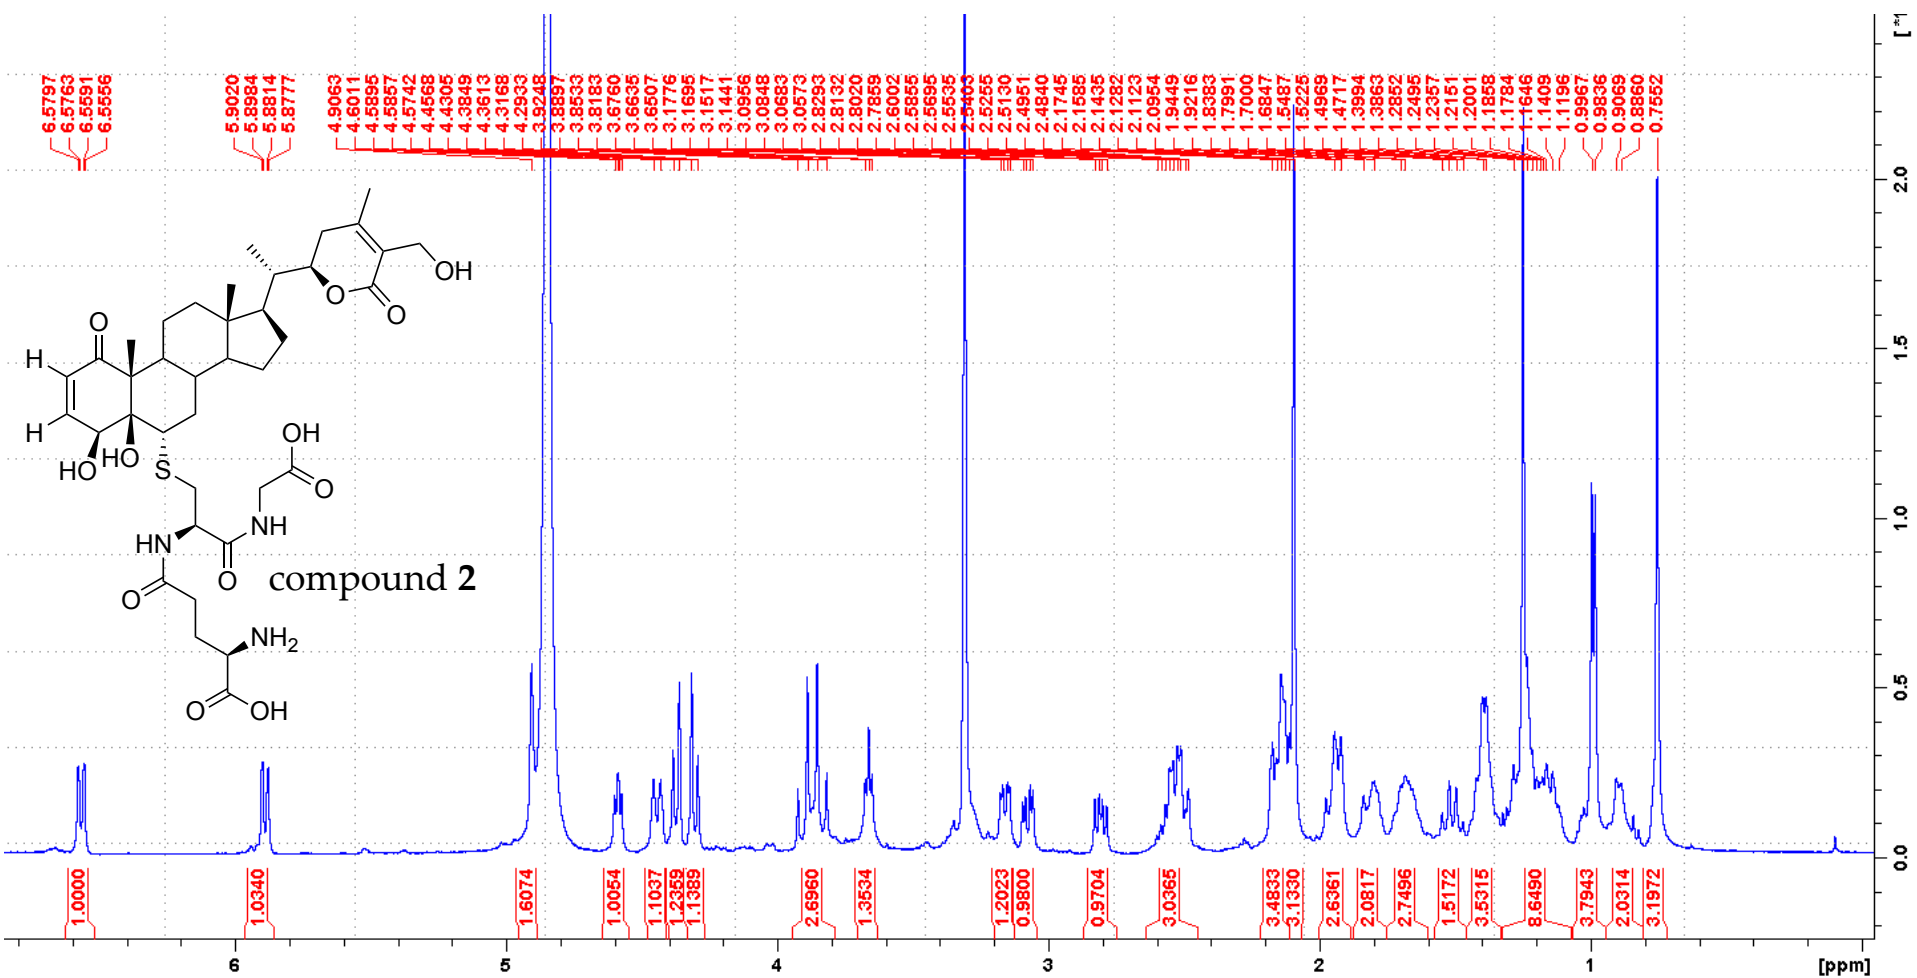

S9.  $^1\text{H-NMR}$  spectrum (500 MHz, MeOD) of compound 2

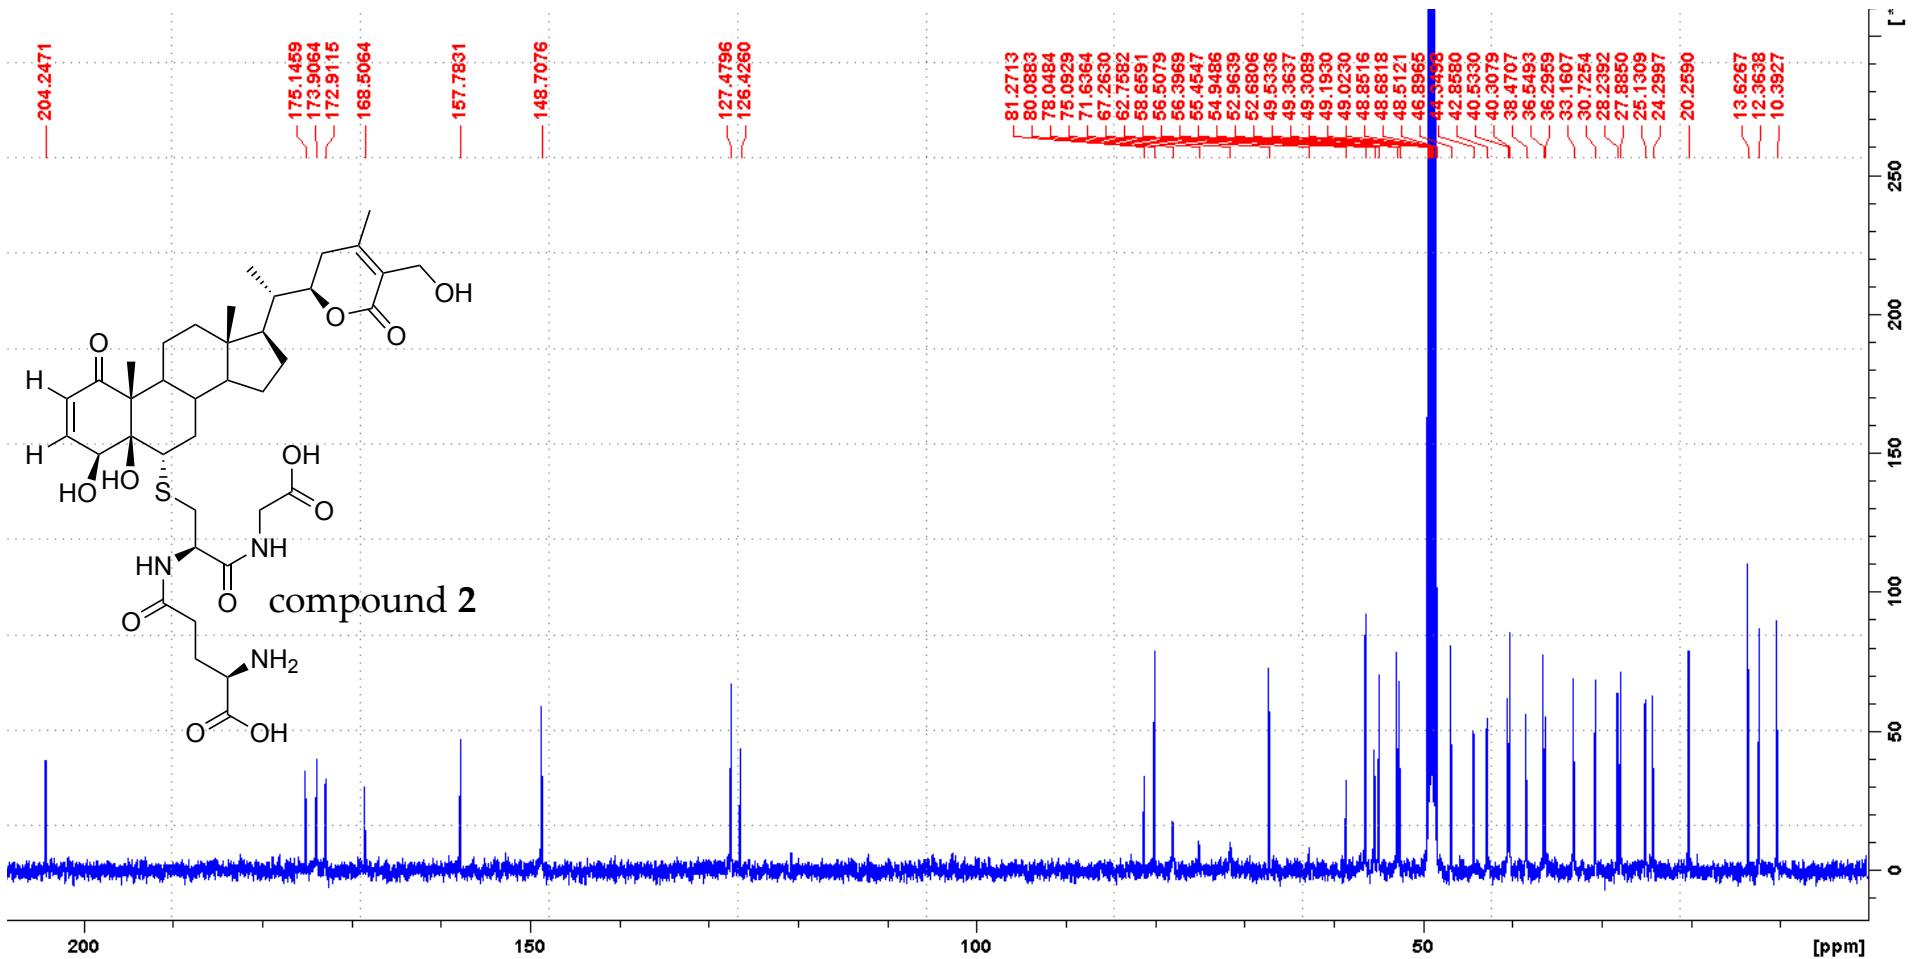

S10.  $^{13}\text{C}$ -NMR spectrum (125 MHz, MeOD) of compound 2

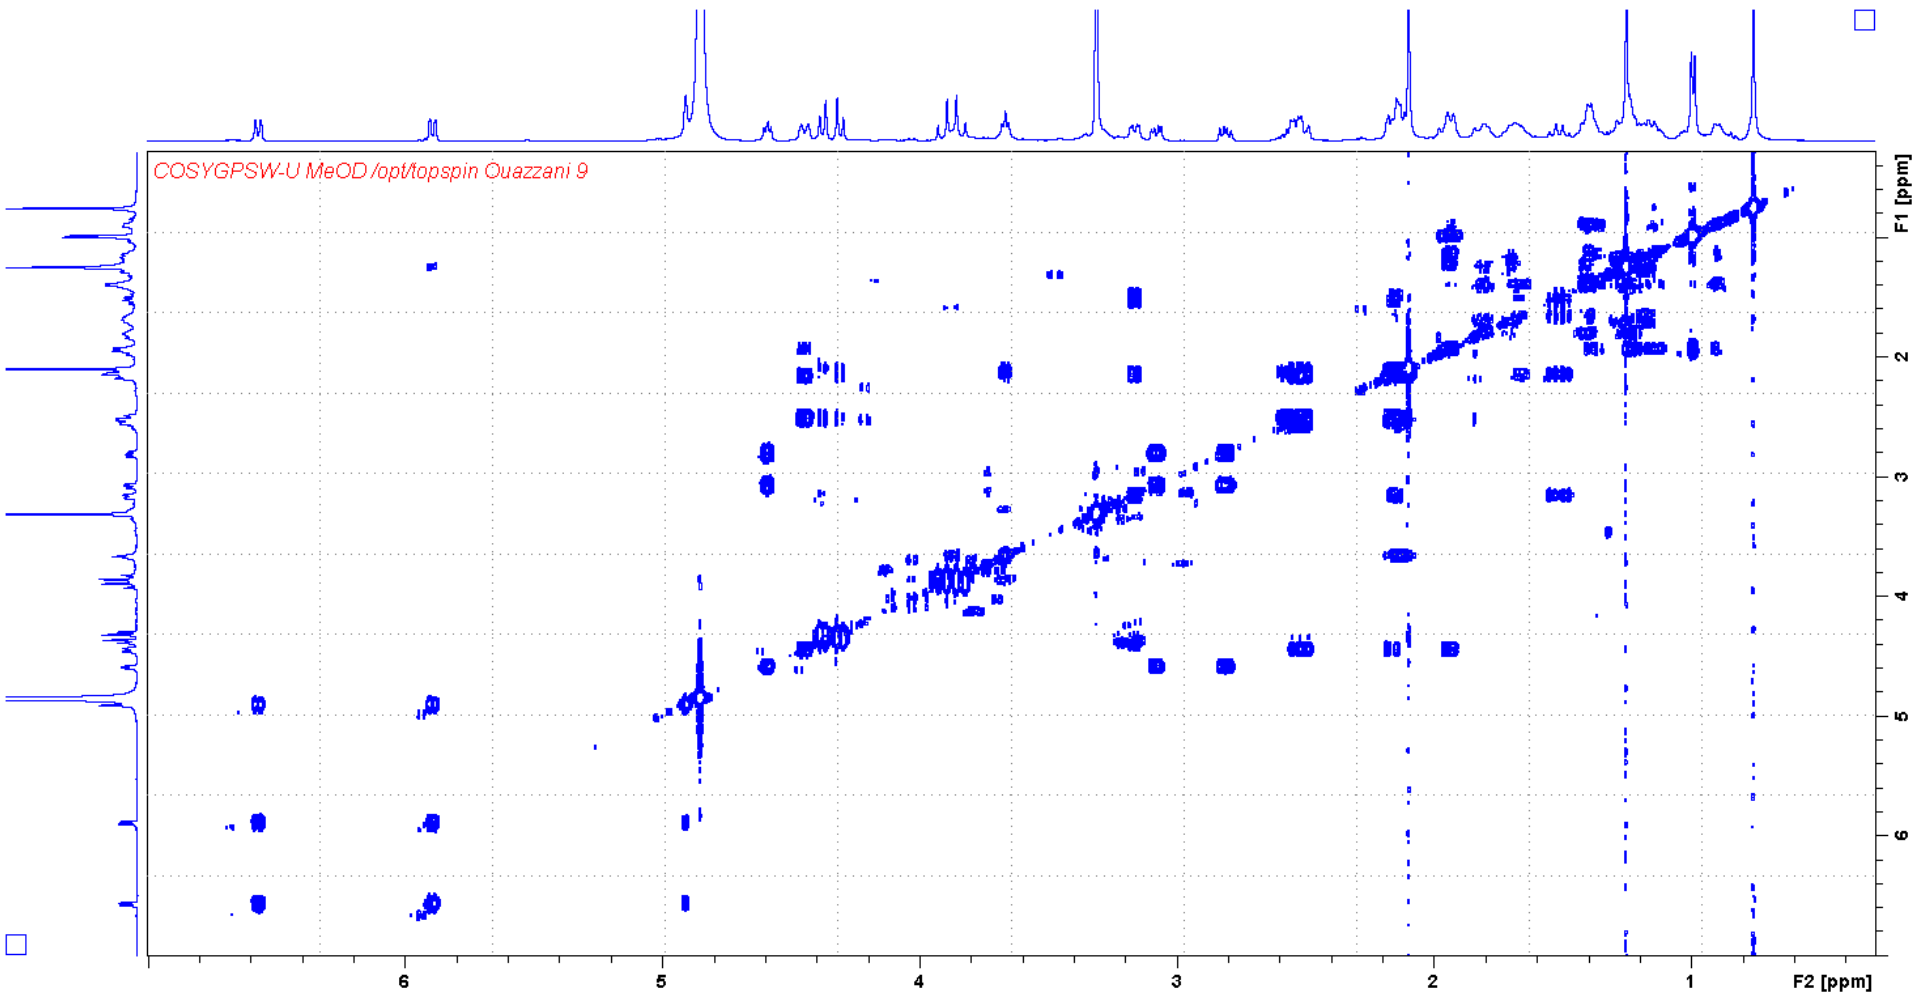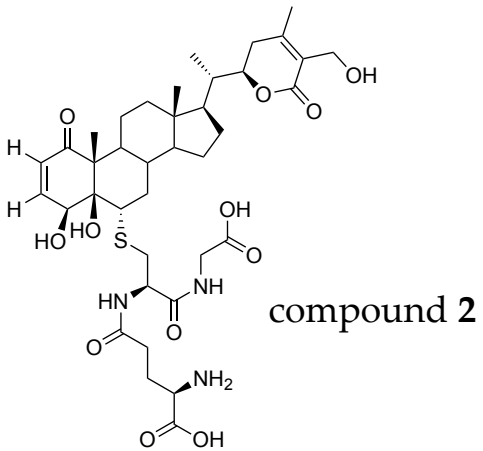

**S11.**  $^1\text{H}$ - $^1\text{H}$  COSY NMR spectrum (500 MHz, MeOD) of compound 2

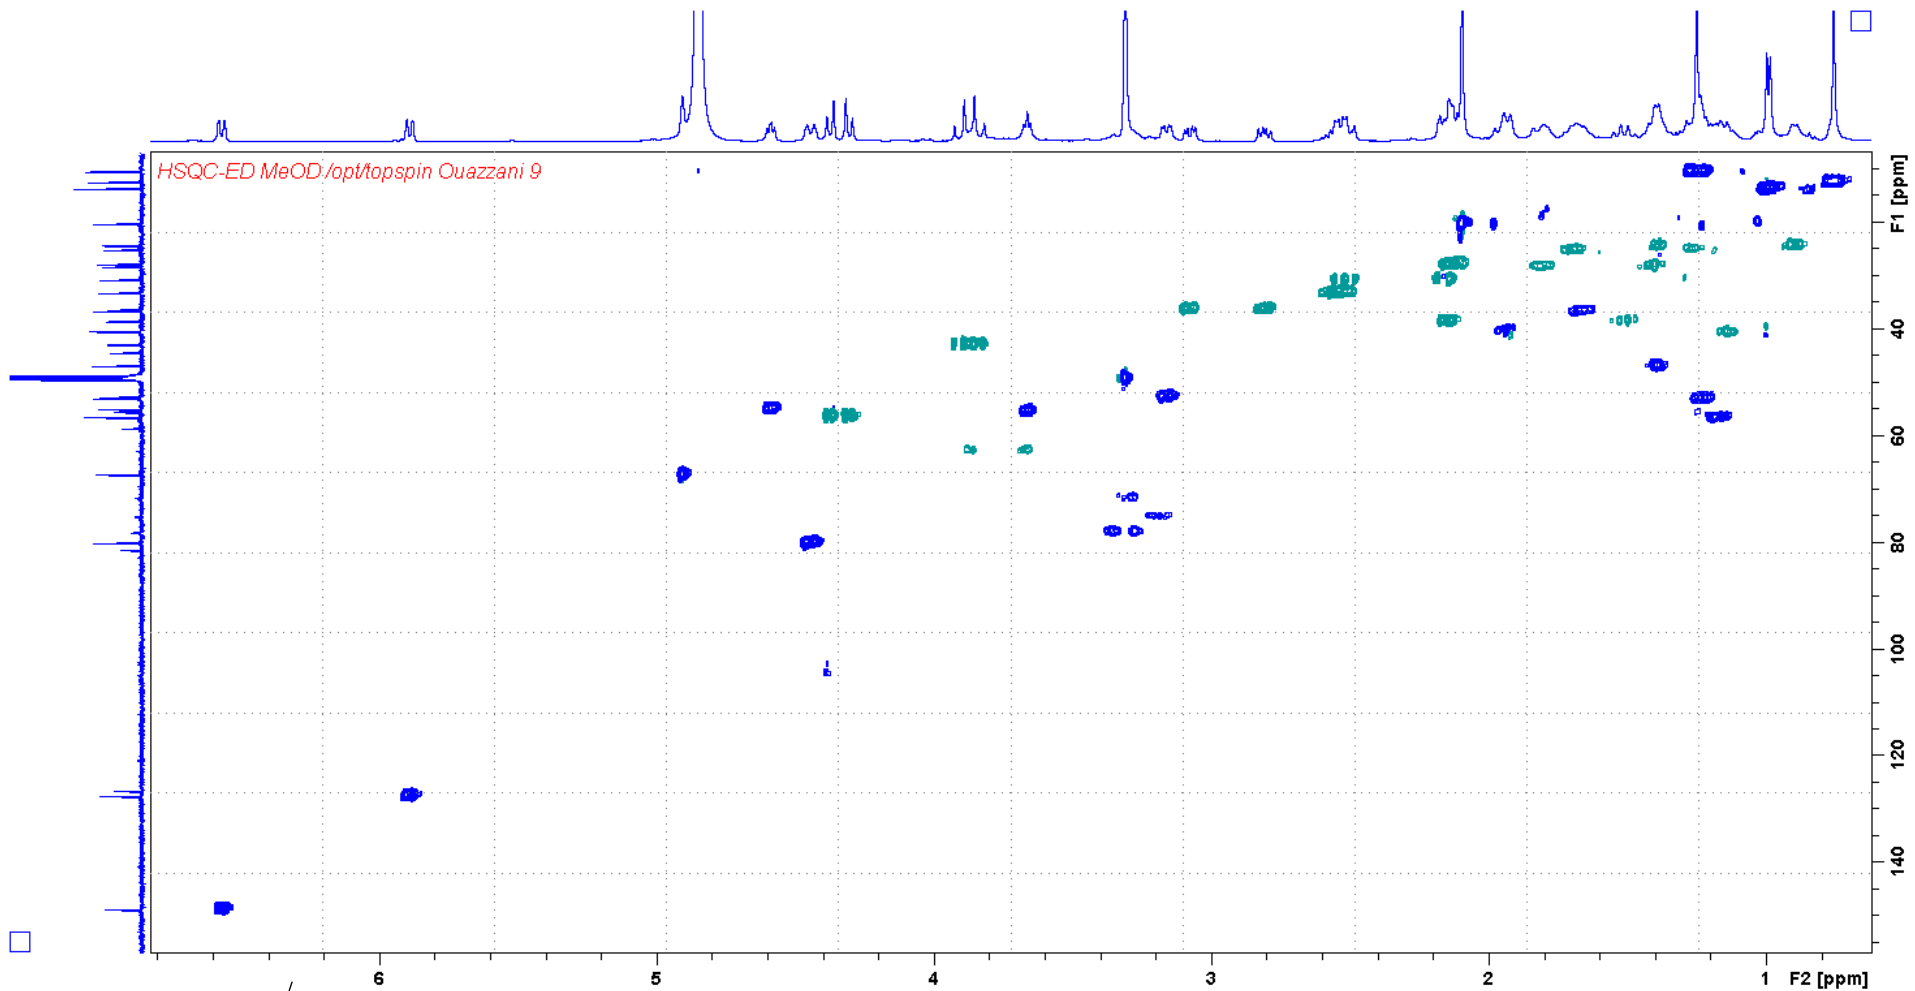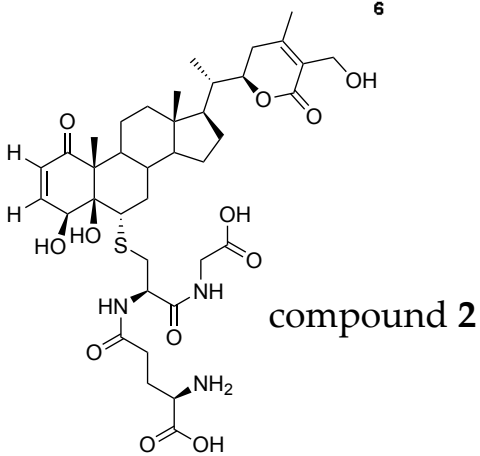

S12.  $^1\text{H}$ - $^{13}\text{C}$  HSQC-ED NMR spectrum (500 MHz, MeOD) of compound 2

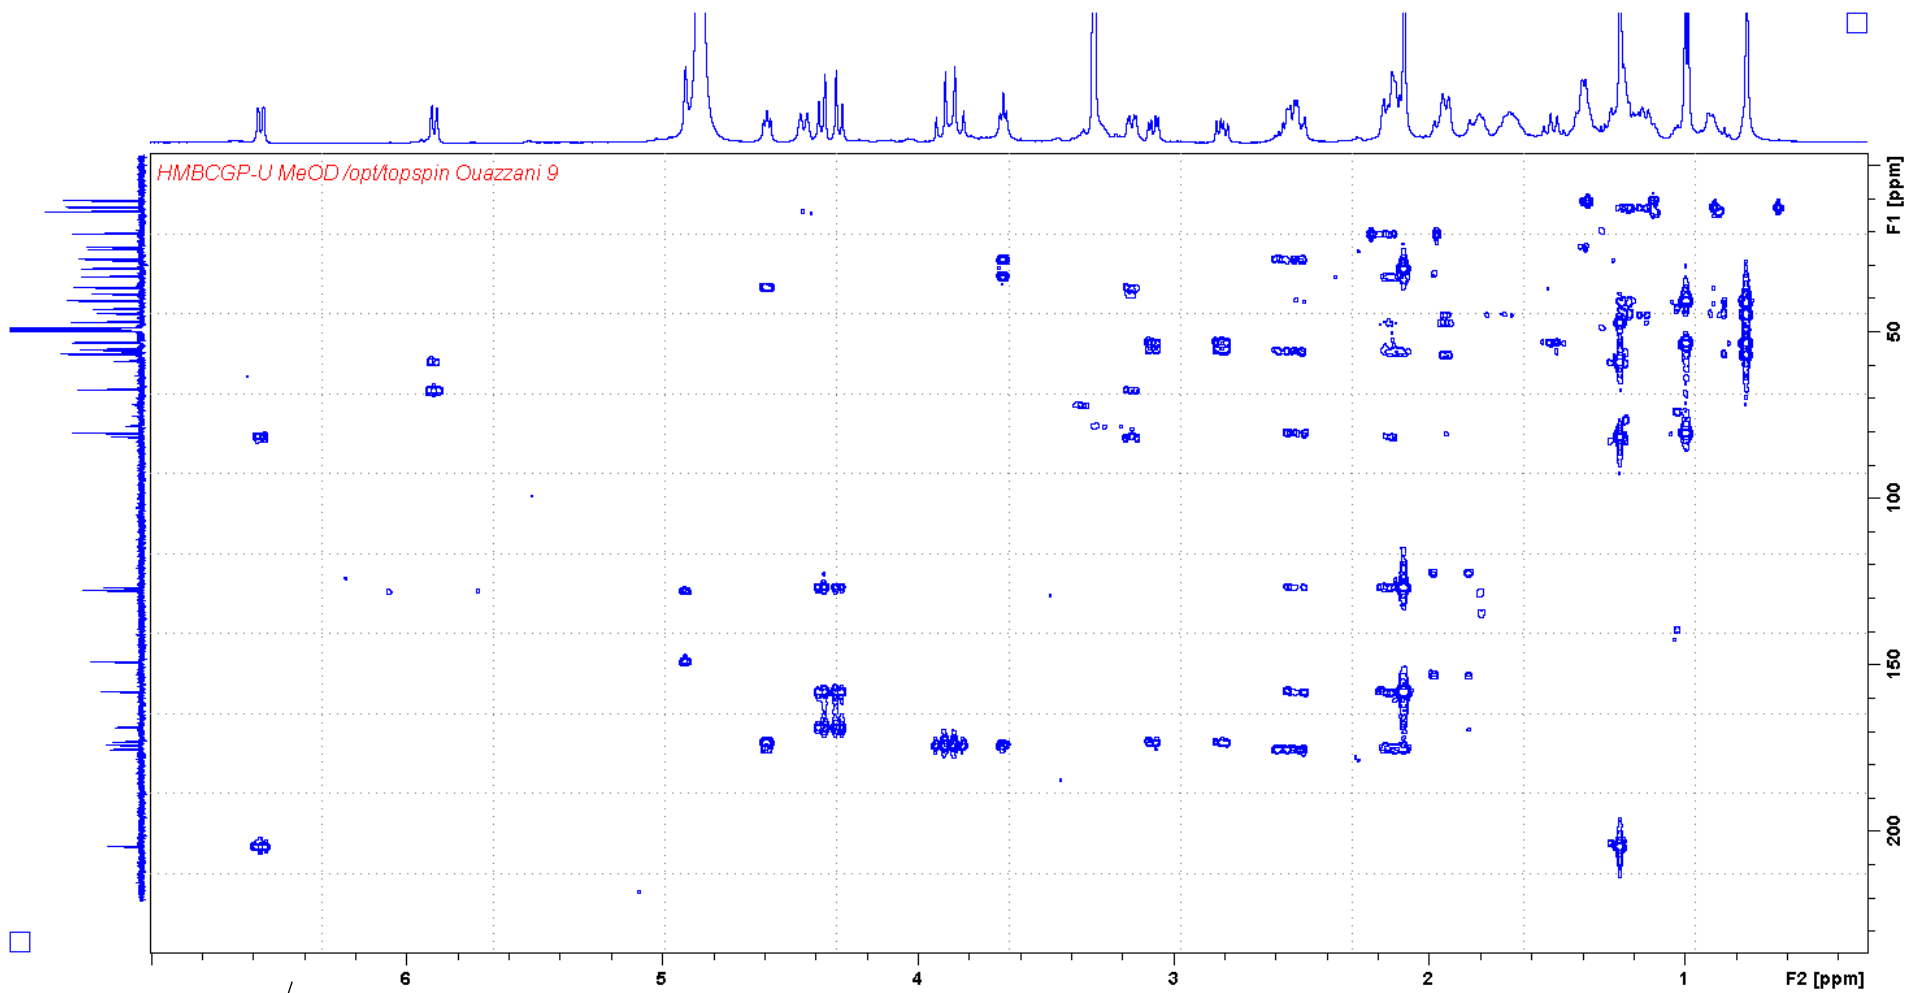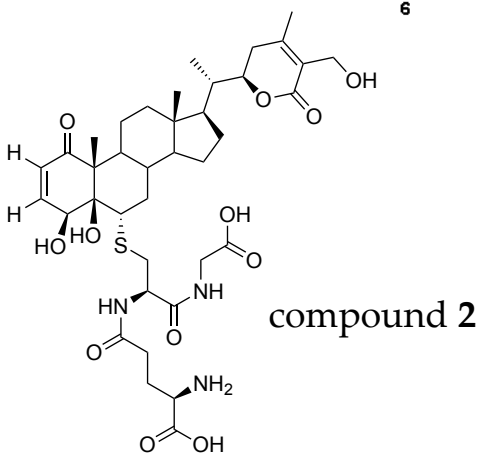

S13.  $^1\text{H}$ - $^{13}\text{C}$  HMBC NMR spectrum (500 MHz, MeOD) of compound 2

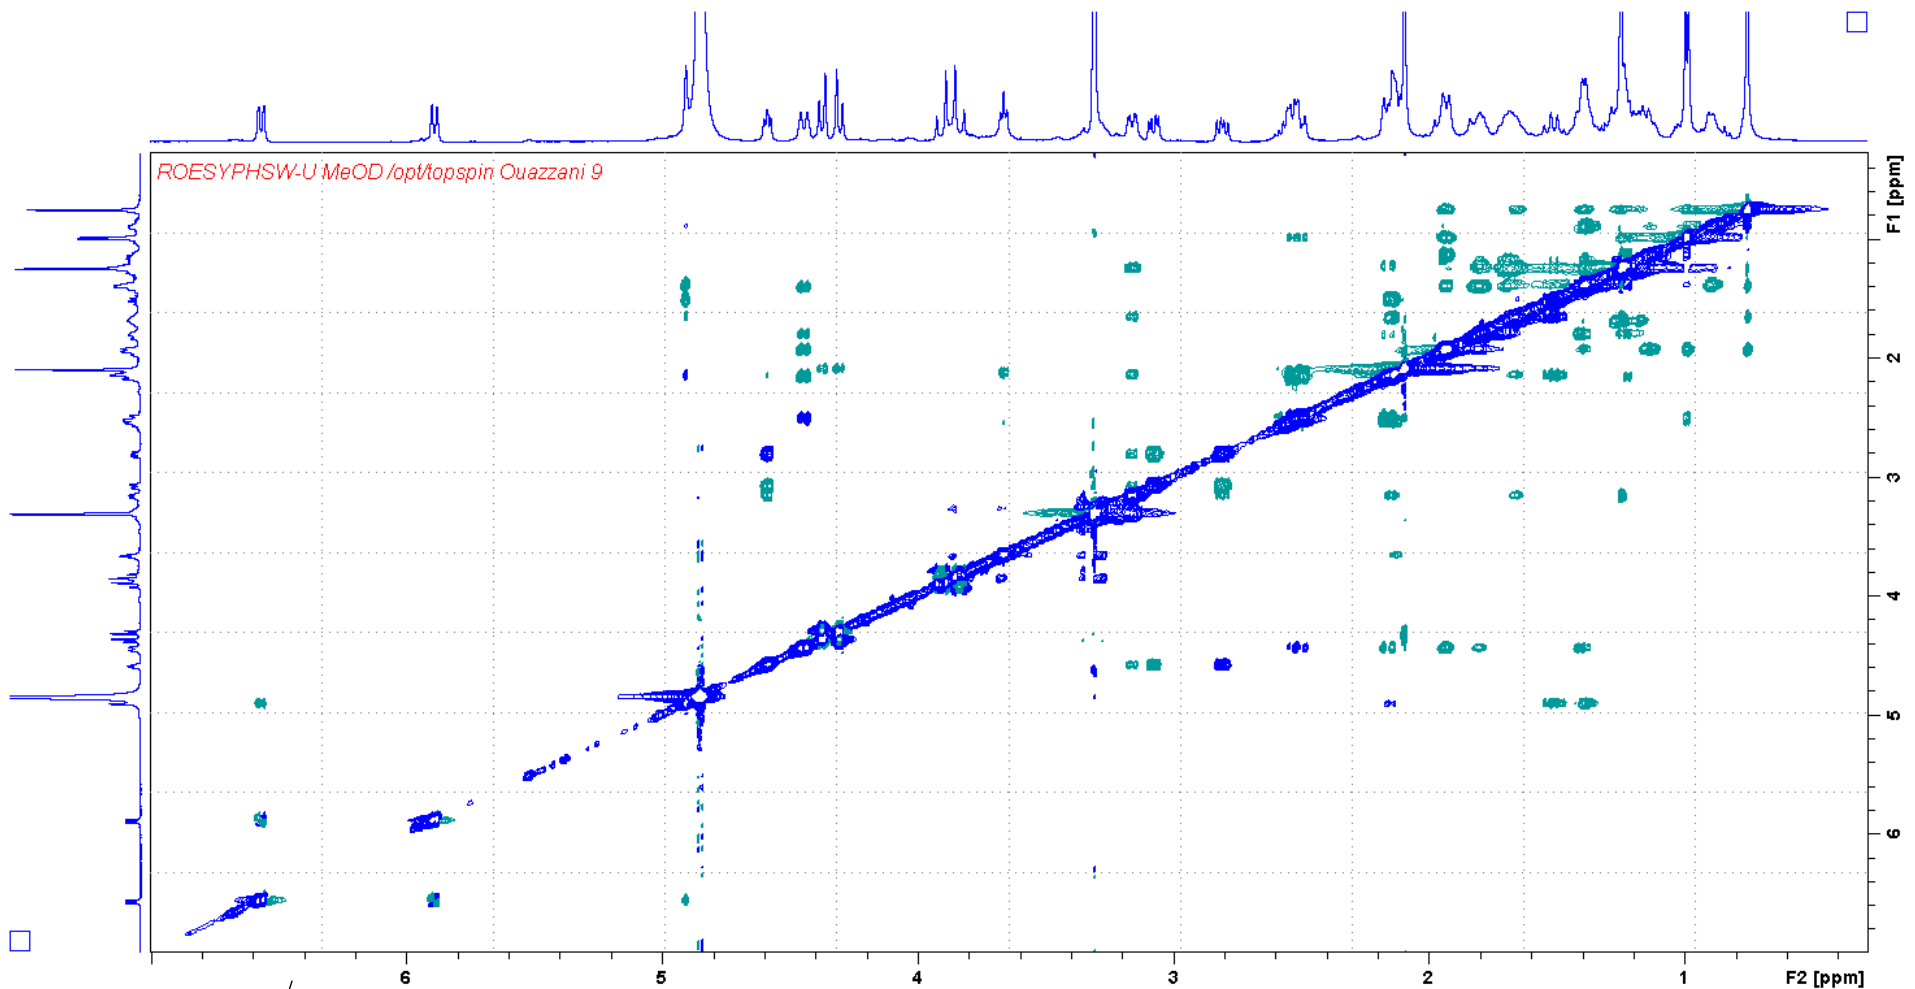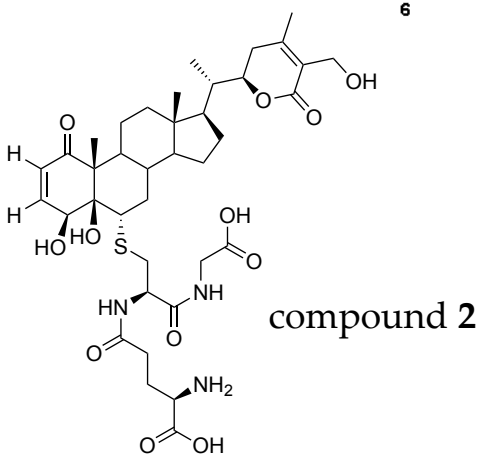

**S14.**  $^1\text{H}$ - $^1\text{H}$  ROESY NMR spectrum (500 MHz, MeOD) of compound 2

Single Mass Analysis

Tolerance = 10.0 PPM / DBE: min = -1.5, max = 100.0

Element prediction: Off

Number of isotope peaks used for i-FIT = 9

Monoisotopic Mass, Even Electron Ions

240 formula(e) evaluated with 3 results within limits (all results (up to 1000) for each mass)

Elements Used:

C: 0-100 H: 0-100 N: 3-3 O: 0-100 S: 1-1

OUAZZANI\_arcile64-1 24 (0.625) Cm (17:29-41:68x2.000)

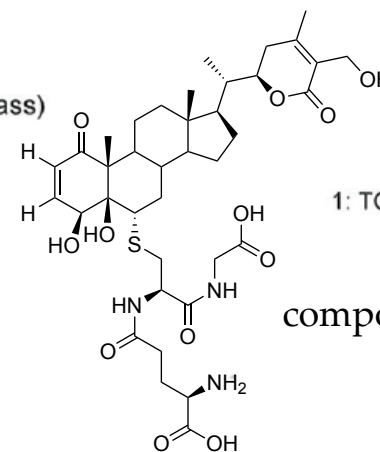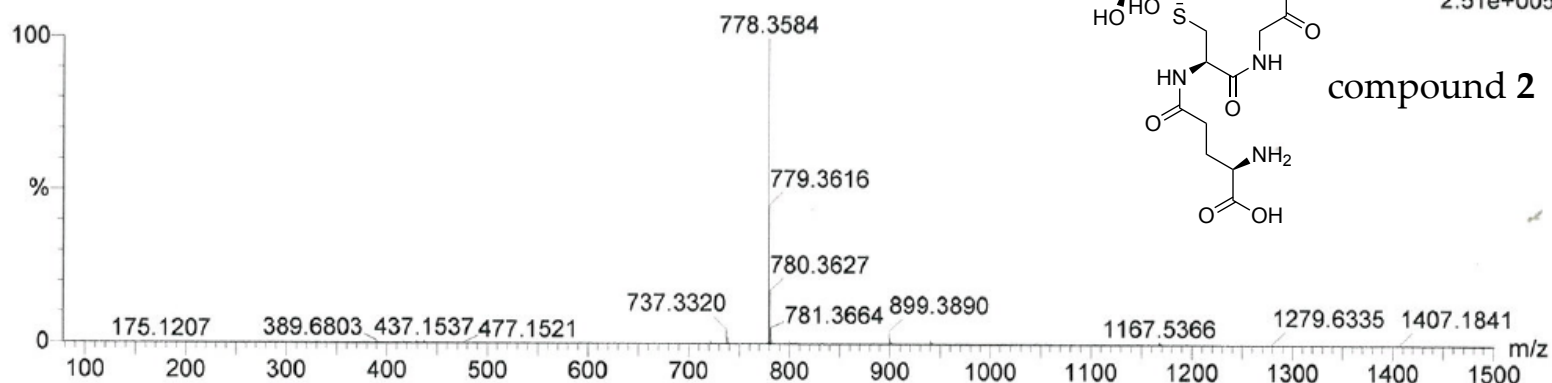

Minimum: -1.5  
Maximum: 5.0 10.0 100.0

| Mass     | Calc. Mass | mDa  | PPM  | DBE  | i-FIT | i-FIT (Norm) | Formula             |
|----------|------------|------|------|------|-------|--------------|---------------------|
| 778.3584 | 778.3585   | -0.1 | -0.1 | 12.5 | 956.6 | 0.0          | C38 H56 N3 O12      |
|          | 778.3526   | 5.8  | 7.5  | 21.5 | 964.9 | 8.3          | S<br>C45 H52 N3 O7  |
|          | 778.3643   | -5.9 | -7.6 | 3.5  | 966.0 | 9.4          | S<br>C31 H60 N3 O17 |

S15. HRMS spectrum of compound 2



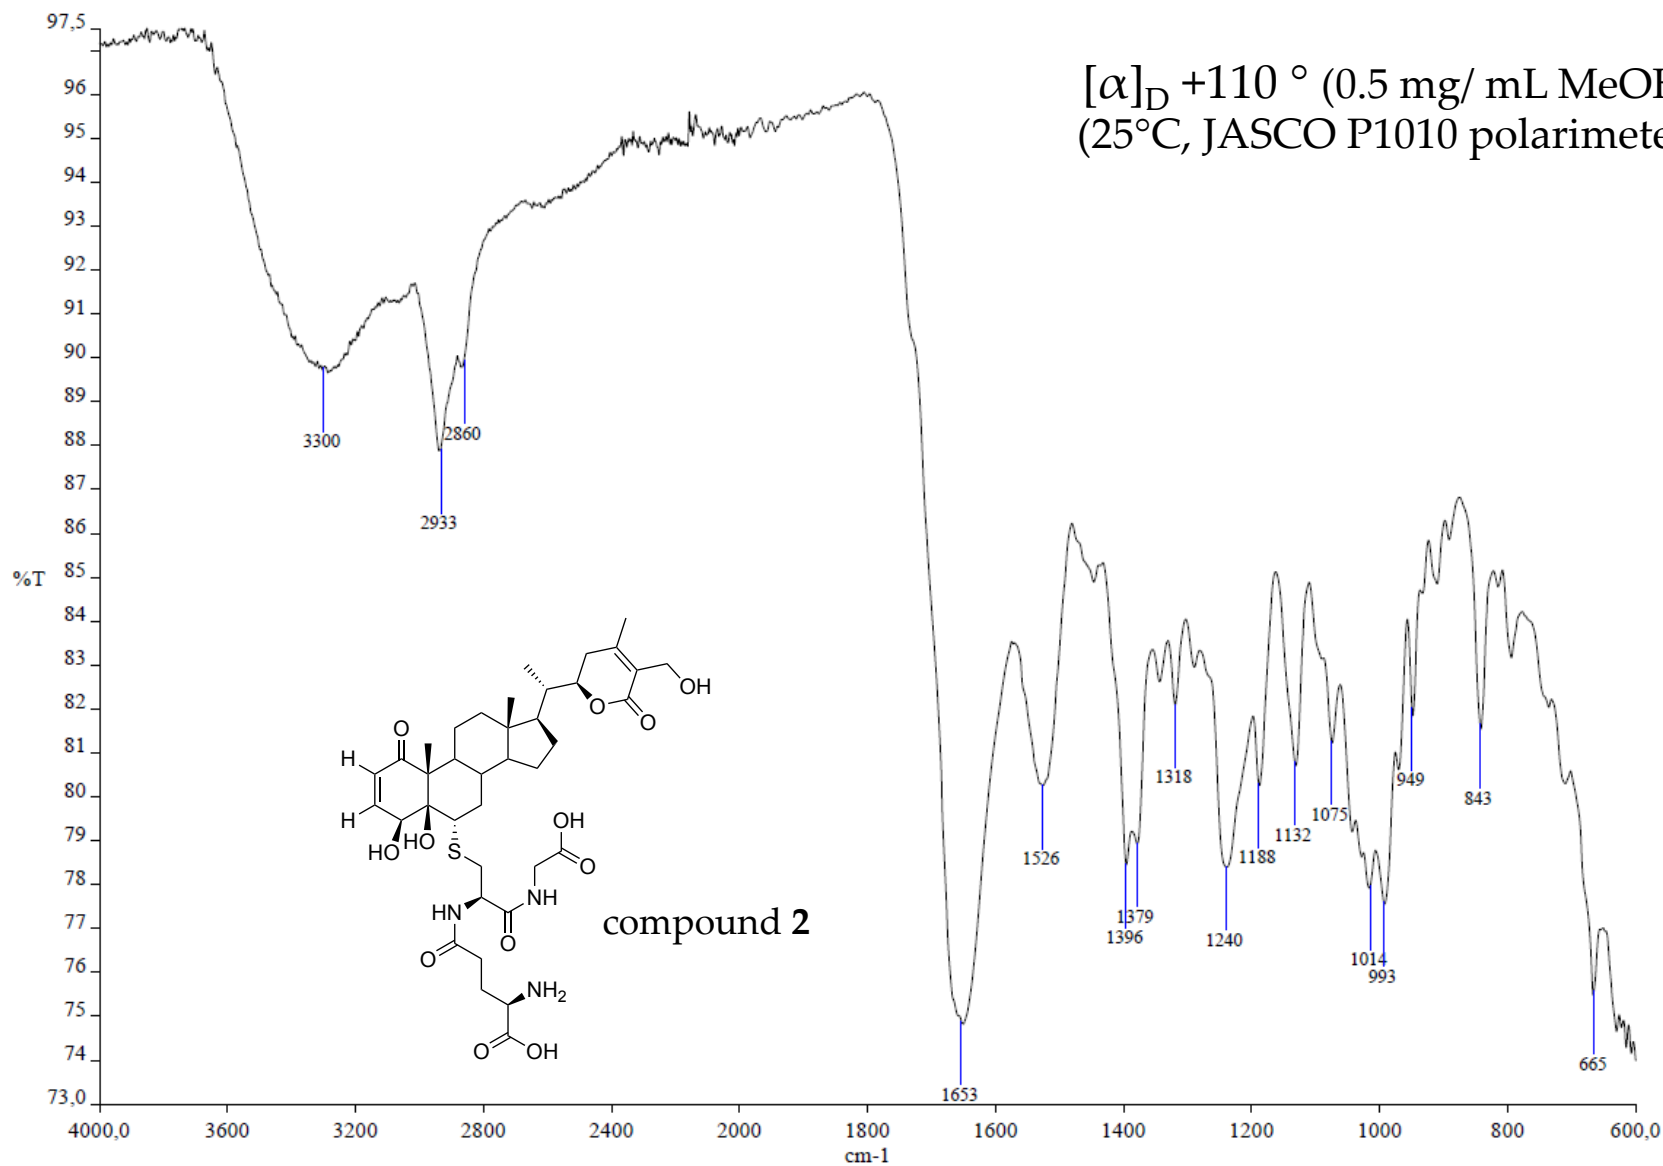

**S16.** IR spectrum of compound 2
